# Supplementary material
Source: publisher site journal article supplement (https://www.dovepress.com/article/315379)
Supplement: Supplementary file 1 [file get_supplementary_file.php]

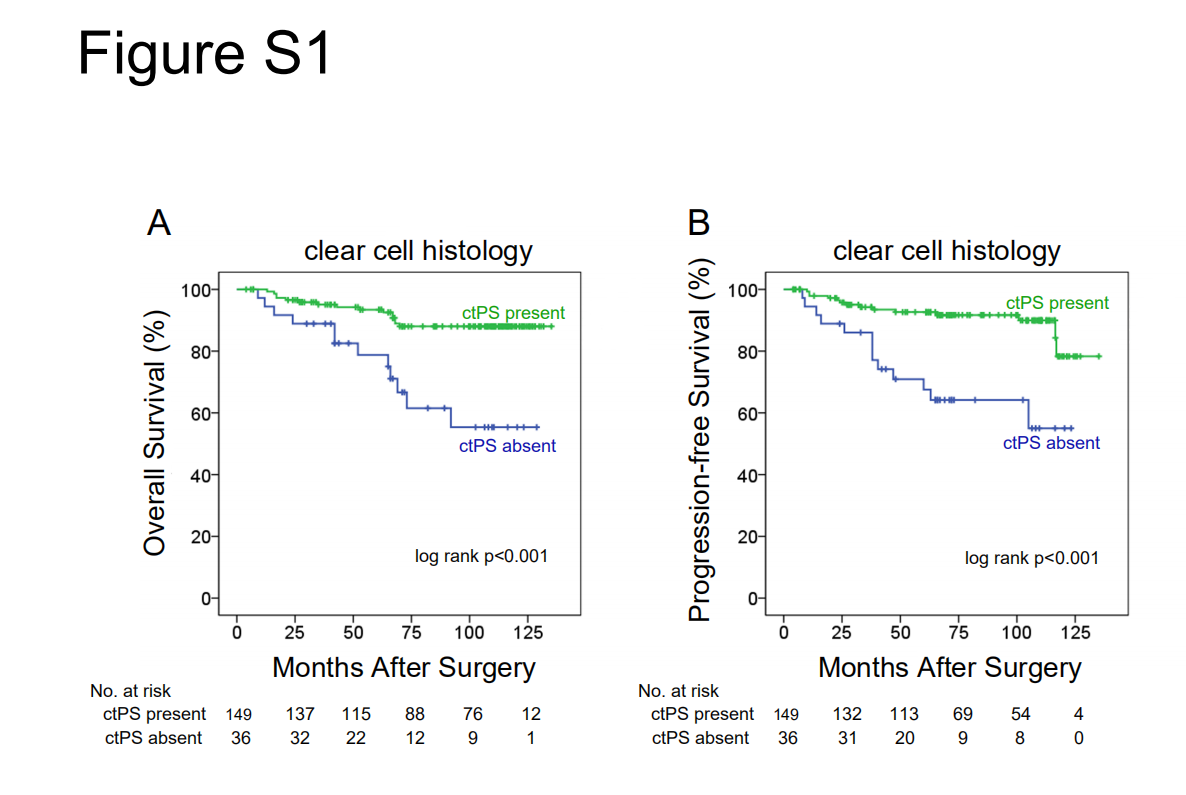


**Figure S1.** Kaplan-Meier OS (A) and PFS (B) curves in patients with clear cell RCC

**Table S1. Comparison between ctPS presence and ctPS absence**

| **Vaiables** | **ctPS absent** | **ctPS present** | **p** |
| --- | --- | --- | --- |
| No. gender (%) |  |  | 0.143 |
| male | 31 (20.5) | 120 (79.5) |  |
| female | 7 (11.9) | 52 (88.1) |  |
| Mean age±sd, yrs | 58.1±11.6 | 58.4±11.6 | 0.877 |
| Mean tumor diameter±sd, cm | 4.0±2.5 | 4.1±2.1 | 0.781 |
| Surgery |  |  | 0.948 |
| radical | 19 (18.3) | 85 (81.7) |  |
| partial | 19 (17.9) | 87 (82.1) |  |
| No. TNM stage (%) |  |  | 0.964 |
| I | 24 (17.6) | 112 (82.4) |  |
| II | 4 (20.0) | 16 (80.0) |  |
| III | 10 (18.5) | 44 (81.5) |  |
| No. Nuclear grade (%) |  |  | 0.359 |
| G1 | 4 (14.8) | 23 (85.2) |  |
| G2 | 18 (16.4) | 92 (83.6) |  |
| G3 | 9 (17.6) | 42 (82.4) |  |
| G4 | 7 (31.8) | 15 (68.2) |  |
| No. histology (%) |  |  | 0.129 |
| clear cell | 36 (19.5) | 149 (80.5) |  |
| non-clear cell | 2 (8.0) | 23 (92.0) |  |
| No. necrosis (%) |  |  | 0.865 |
| with | 9 (17.3) | 43 (82.7) |  |
| without | 29 (18.4) | 129 (81.6) |  |
